# Supplementary material for: Spatial Analysis of Neo-tectonic Signatures in Lower Subansiri Sub-basin using Morphometric Parameters and Fuzzy-AHP
Source: Research Square preprint supplement (doi:10.21203/rs.3.rs-8057270/v1), 2025-11-20
Supplement: Supplementary file 1 [file 511f5c0aab9b2cb1e1af0b6f.docx]

**Table 1:** Morphometric Parameters

| **Sl no** | **Parameters** | **Symb - ols** | | **Formula** | **Description** | **References** |
| --- | --- | --- | --- | --- | --- | --- |
| **Lineal Aspect** | | | | | | |
| 1 | Total Stream Number |  | |  |  | Horton (1945) |
| 2 | Total Stream Length |  | |  | = *length of the stream* | Horton (1945) |
| 3 | Bifurcation Ratio |  | |  | *Where,*  *Number segment of next*  *higher order u* | Schumn (1956) |
| 4 | Mean Bifurcation Ratio |  | |  | =*Mean bifurcation Ratio* | Strahlar and Chow (1964) |
| 5 | Sinuosity Index | SI | | S= | *Where S=Sinuosity Index*  *SL=Stream length*  *VL=Valley length* | Leopold and Wolman (1964) |
| 6 | Drainage Density |  | |  | *Where,*  *A= Area* | Strahler (1964) |
| 7 | Drainage Frequency |  | |  | *Where,*  *N= Total number of stream segment of order u*  *A= Area* | Horton (1945) |
| 8 | Drainage Texture |  | |  | *Total number of stream segment of order u*  *P = Perimeter* | Horton (1945) |
| 9 | Length of overland flow |  | | = | *= Drainage Density of the basin* | Horton (1945) |
| 10 | Fitness Ratio |  | | = | *= Basin Length*  *P = Perimeter* | Milton (1957) |
| 11 | Infiltration Number |  | | = × | *= Drainage texture*  *= Drainage Density* | Faniran (1958) |
| 12 | Constant Channel Maintenance |  | | = | *= Drainage density of the basin* | Schumm (1956) |
| **Areal Aspect** | | | | | | |
| 13 | Basin Shape Factor |  |  | | *A= Area* | Horton (1932) |
| 14 | Elongation Ratio |  |  | | *Where,*  *A= Area,* | Schumn (1956) |
| 15 | Form Factor |  | = | | *Where*,  *A= Area* | Horton (1945) |
| 16 | Circularity Ratio |  |  | | *A= Area,*  *P= Perimeter* | Miller (1953) |
| 17 | Compactness Factor |  |  | | *Where,*  *P= Perimeter*  *A=Area* | Gravelius (1914), |
| 18 | Laminicate’s Constant | *K* | K = | | *= Basin Length*  *=3.14*  *A=Area* | Chorley et al. (1957) |
| **Relief Aspect** | | | | | | |
| 19 | Basin Relief | *H* | | *H*= maximum elevation –minimum elevation | | Strahler (1952) |
| 20 | Basin Relief Ratio |  | |  | *Where,*  *H= Basin relief*  *= Basin Length* | Schumm (1956) |
| 21 | Basin Relative Relief |  | |  | *Where,*  *H= Basin relief*  *P=Perimeter* | Singh and Dhillion (1984) |
| 22 | HysometricIntregral | *HI* | | *HI*= | | Strahler (1952) |
| 23 | Ruggedness number |  | |  | *Where,*  *H= Basin relief* | Strahler, (1957) |
| 24 | Stream Gradient |  | | = | *Where,*  *(*  *SL= Stream length (* | Hack (1957) |
| 25 | Stream-length gradient index |  | | ( L | *Where,*  *(=Stream gradient*  *L= Total length of the upstream channel* | Hack (1957) |
| 26 | Dissection Index |  | | *= H/Maximum Elevation* | *H=Basin Relief* | Nir (1957) |

**Table 2:** Fuzzy-AHP preference scale (Van Laarhoven and Pedrycz, 1983)

| **Linguistic Variable** | **Fuzzy AHP Scale** | |
| --- | --- | --- |
| **TFS** | **Reciprocal TFS** |
| Equally Preferred | (1, 1, 1) | (1, 1, 1) |
| Equally to Moderately Preferred | (1, 2, 3) | (1/3, ½, 1) |
| Moderately Preferred | (2, 3, 4) | (1/4, 1/3, ½) |
| Moderately to Strongly Preferred | (3, 4, 5) | (1/5, ¼, 1/3) |
| Strongly Preferred | (4, 5, 6) | (1/6, 1/5, ¼) |
| Strongly to Very Strongly Preferred | (5, 6, 7) | (1/7, 1/6, 1/5) |
| Very Strongly Preferred | (6, 7, 8) | (1/8, 1/7, 1/6) |
| Very Strongly to Extremely Preferred | (7, 8, 9) | (1/9, 1/8, 1/7) |
| Extremely Preferred | (8, 9, 9) | (1/9, 1/9, 1/8) |

**Table 3:**Pair-wise comparison

| **Pair-wise Comparison Matrix** | | | | | | | | | | | | | | | | | | | |
| --- | --- | --- | --- | --- | --- | --- | --- | --- | --- | --- | --- | --- | --- | --- | --- | --- | --- | --- | --- |
|  | ***SI*** |  |  |  |  | ***K*** |  |  |  |  |  |  |  |  |  | ***HI*** |  |  | ***h*** |
| ***SI*** | **1,1,1** | 1/3,1/2,1 | 1/3,1/2,1 | 1/4,1/3,1/2 | 1/4,1/3,1/2 | 1/5,1/4,1/3 | 1/5,1/4,1/3 | 1/6,1/5,1/4 | 1/6,1/5,1/4 | 1/6,1/5,1/4 | 1/7,1/6,1/5 | 1/7,1/6,1/5 | 1/7,1/6,1/5 | 1/8,1/7,1/6 | 1/8,1/7,1/6 | 1/8,1/7,1/6 | 1/9,1/8,1/7 | 1/9,1/9,1/8 | 1/9,1/9,1/8 |
|  | 1,2,3 | **1,1,1** | 1/3,1/2,1 | 1/3,1/2,1 | 1/4,1/3,1/2 | 1/4,1/3,1/2 | 1/5,1/4,1/3 | 1/5,1/4,1/3 | 1/6,1/5,1/4 | 1/6,1/5,1/4 | 1/6,1/5,1/4 | 1/7,1/6,1/5 | 1/7,1/6,1/5 | 1/7,1/6,1/5 | 1/8,1/7,1/6 | 1/8,1/7,1/6 | 1/8,1/7,1/6 | 1/9,1/8,1/7 | 1/9,1/9,1/8 |
|  | 1,2,3 | 1,2,3 | **1,1,1** | 1/3,1/2,1 | 1/3,1/2,1 | 1/4,1/3,1/2 | 1/4,1/3,1/2 | 1/5,1/4,1/3 | 1/5,1/4,1/3 | 1/6,1/5,1/4 | 1/6,1/5,1/4 | 1/6,1/5,1/4 | 1/7,1/6,1/5 | 1/7,1/6,1/5 | 1/7,1/6,1/5 | 1/8,1/7,1/6 | 1/8,1/7,1/6 | 1/8,1/7,1/6 | 1/9,1/8,1/7 |
|  | 2,3,4 | 1,2,3 | 1,2,3 | **1,1,1** | 1/3,1/2,1 | 1/3,1/2,1 | 1/4,1/3,1/2 | 1/4,1/3,1/2 | 1/5,1/4,1/3 | 1/5,1/4,1/3 | 1/6,1/5,1/4 | 1/6,1/5,1/4 | 1/6,1/5,1/4 | 1/7,1/6,1/5 | 1/7,1/6,1/5 | 1/7,1/6,1/5 | 1/8,1/7,1/6 | 1/8,1/7,1/6 | 1/8,1/7,1/6 |
|  | 2,3,4 | 2,3,4 | 1,2,3 | 1,2,3 | **1,1,1** | 1/3,1/2,1 | 1/3,1/2,1 | 1/4,1/3,1/2 | 1/4,1/3,1/2 | 1/5,1/4,1/3 | 1/5,1/4,1/3 | 1/6,1/5,1/4 | 1/6,1/5,1/4 | 1/6,1/5,1/4 | 1/7,1/6,1/5 | 1/7,1/6,1/5 | 1/7,1/6,1/5 | 1/8,1/7,1/6 | 1/8,1/7,1/6 |
| ***K*** | 3,4,5 | 2,3,4 | 2,3,4 | 1,2,3 | 1,2,3 | **1,1,1** | 1/3,1/2,1 | 1/3,1/2,1 | 1/4,1/3,1/2 | 1/4,1/3,1/2 | 1/5,1/4,1/3 | 1/5,1/4,1/3 | 1/6,1/5,1/4 | 1/6,1/5,1/4 | 1/6,1/5,1/4 | 1/7,1/6,1/5 | 1/7,1/6,1/5 | 1/7,1/6,1/5 | 1/8,1/7,1/6 |
|  | 3,4,5 | 3,4,5 | 2,3,4 | 2,3,4 | 1,2,3 | 1,2,3 | **1,1,1** | 1/3,1/2,1 | 1/3,1/2,1 | 1/4,1/3,1/2 | 1/4,1/3,1/2 | 1/5,1/4,1/3 | 1/5,1/4,1/3 | 1/6,1/5,1/4 | 1/6,1/5,1/4 | 1/6,1/5,1/4 | 1/7,1/6,1/5 | 1/7,1/6,1/5 | 1/7,1/6,1/5 |
|  | 4,5,6 | 3,4,5 | 3,4,5 | 2,3,4 | 2,3,4 | 1,2,3 | 1,2,3 | **1,1,1** | 1/3,1/2,1 | 1/3,1/2,1 | 1/4,1/3,1/2 | 1/4,1/3,1/2 | 1/5,1/4,1/3 | 1/5,1/4,1/3 | 1/6,1/5,1/4 | 1/6,1/5,1/4 | 1/6,1/5,1/4 | 1/7,1/6,1/5 | 1/7,1/6,1/5 |
|  | 4,5,6 | 4,5,6 | 3,4,5 | 3,4,5 | 2,3,4 | 2,3,4 | 1,2,3 | 1,2,3 | **1,1,1** | 1/3,1/2,1 | 1/3,1/2,1 | 1/4,1/3,1/2 | 1/4,1/3,1/2 | 1/5,1/4,1/3 | 1/5,1/4,1/3 | 1/6,1/5,1/4 | 1/6,1/5,1/4 | 1/6,1/5,1/4 | 1/7,1/6,1/5 |
|  | 4,5,6 | 4,5,6 | 4,5,6 | 3,4,5 | 3,4,5 | 2,3,4 | 2,3,4 | 1,2,3 | 1,2,3 | **1,1,1** | 1/3,1/2,1 | 1/3,1/2,1 | 1/4,1/3,1/2 | 1/4,1/3,1/2 | 1/5,1/4,1/3 | 1/5,1/4,1/3 | 1/6,1/5,1/4 | 1/6,1/5,1/4 | 1/6,1/5,1/4 |
|  | 5,6,7 | 4,5,6 | 4,5,6 | 4,5,6 | 3,4,5 | 3,4,5 | 2,3,4 | 2,3,4 | 1,2,3 | 1,2,3 | **1,1,1** | 1/3,1/2,1 | 1/3,1/2,1 | 1/4,1/3,1/2 | 1/4,1/3,1/2 | 1/5,1/4,1/3 | 1/5,1/4,1/3 | 1/6,1/5,1/4 | 1/6,1/5,1/4 |
|  | 5,6,7 | 5,6,7 | 4,5,6 | 4,5,6 | 4,5,6 | 3,4,5 | 3,4,5 | 2,3,4 | 2,3,4 | 1,2,3 | 1,2,3 | **1,1,1** | 1/3,1/2,1 | 1/3,1/2,1 | 1/4,1/3,1/2 | 1/4,1/3,1/2 | 1/5,1/4,1/3 | 1/5,1/4,1/3 | 1/6,1/5,1/4 |
|  | 5,6,7 | 5,6,7 | 5,6,7 | 4,5,6 | 4,5,6 | 4,5,6 | 3,4,5 | 3,4,5 | 2,3,4 | 2,3,4 | 1,2,3 | 1,2,3 | **1,1,1** | 1/3,1/2,1 | 1/3,1/2,1 | 1/4,1/3,1/2 | 1/4,1/3,1/2 | 1/5,1/4,1/3 | 1/5,1/4,1/3 |
|  | 6,7,8 | 5,6,7 | 5,6,7 | 5,6,7 | 4,5,6 | 4,5,6 | 4,5,6 | 3,4,5 | 3,4,5 | 2,3,4 | 2,3,4 | 1,2,3 | 1,2,3 | **1,1,1** | 1/3,1/2,1 | 1/3,1/2,1 | 1/4,1/3,1/2 | 1/4,1/3,1/2 | 1/5,1/4,1/3 |
|  | 6,7,8 | 6,7,8 | 5,6,7 | 5,6,7 | 5,6,7 | 4,5,6 | 4,5,6 | 4,5,6 | 3,4,5 | 3,4,5 | 2,3,4 | 2,3,4 | 1,2,3 | 1,2,3 | **1,1,1** | 1/3,1/2,1 | 1/3,1/2,1 | 1/4,1/3,1/2 | 1/4,1/3,1/2 |
| ***HI*** | 6,7,8 | 6,7,8 | 6,7,8 | 5,6,7 | 5,6,7 | 5,6,7 | 4,5,6 | 4,5,6 | 4,5,6 | 3,4,5 | 3,4,5 | 2,3,4 | 2,3,4 | 1,2,3 | 1,2,3 | **1,1,1** | 1/3,1/2,1 | 1/3,1/2,1 | 1/4,1/3,1/2 |
|  | 7,8,9 | 6,7,8 | 6,7,8 | 6,7,8 | 5,6,7 | 5,6,7 | 5,6,7 | 4,5,6 | 4,5,6 | 4,5,6 | 3,4,5 | 3,4,5 | 2,3,4 | 2,3,4 | 1,2,3 | 1,2,3 | **1,1,1** | 1/3,1/2,1 | 1/3,1/2,1 |
|  | 8,9,9 | 7,8,9 | 6,7,8 | 6,7,8 | 6,7,8 | 5,6,7 | 5,6,7 | 5,6,7 | 4,5,6 | 4,5,6 | 4,5,6 | 3,4,5 | 3,4,5 | 2,3,4 | 2,3,4 | 1,2,3 | 1,2,3 | **1,1,1** | 1/3,1/2,1 |
| ***H*** | 8,9,9 | 8,9,9 | 7,8,9 | 6,7,8 | 6,7,8 | 6,7,8 | 5,6,7 | 5,6,7 | 5,6,7 | 4,5,6 | 4,5,6 | 4,5,6 | 3,4,5 | 3,4,5 | 2,3,4 | 2,3,4 | 1,2,3 | 1,2,3 | **1,1,1** |

**Notes:** SI = Sinuosity Index, Df = Drainage Frequency, Dd = Drainage Density, Fr = Fitness Ratio, Rbm = Bifurcation Ratio, K = Laminicate’s Constant, Cm = Constant Channel Maintenance, Sf = Basin Shape Factors, Rf = Form Factor, Rc = Circularity Ratio, Re = Elongation Ratio, DI = Dissection Index, Slg =Stream Length gradient, Sg = Stream gradient, Rn = Ruggedness number, HI = Hypsometric Integral, Rr = Basin Relative Relief, Rh = Basin Relief Ratio, h=basin Relief

**Table 4:** Aggregated Fuzzy Pair-wise Matrix

|  | **Aggregated Fuzzy Pair-wise Matrix** | | | | | | | | | | | | | | | | | | | **Row Sum** |
| --- | --- | --- | --- | --- | --- | --- | --- | --- | --- | --- | --- | --- | --- | --- | --- | --- | --- | --- | --- | --- |
| ***SI*** | **1,1,1** | 0.33,0.5,1 | 0.33,0.5,1 | 0.25,0.33,0.50 | 0.25,0.33,0.50 | 0.20,0.25,0.33 | 0.20,0.25,0.33 | 0.17,0.20,0.25 | 0.17,0.20,0.25 | 0.17,0.20,0.25 | 0.14,0.17,0.20 | 0.14,0.17,0.20 | 0.14,0.17,0.20 | 0.13,0.14,0.17 | 0.13,0.14,0.17 | 0.13,0.14,0.17 | 0.11,0.13,0.14 | 0.11,0.11,0.13 | 0.11,0.11,0.13 | 4.21,5.04,6.92 |
|  | 1,2,3 | **1,1,1** | 0.33,0.5,1 | 0.33,0.5,1 | 0.25,0.33,0.50 | 0.25,0.33,0.50 | 0.20,0.25,0.33 | 0.20,0.25,0.33 | 0.17,0.20,0.25 | 0.17,0.20,0.25 | 0.17,0.20,0.25 | 0.14,0.17,0.20 | 0.14,0.17,0.20 | 0.14,0.17,0.20 | 0.13,0.14,0.17 | 0.13,0.14,0.17 | 0.13,0.14,0.17 | 0.11,0.13,0.14 | 0.11,0.11,0.13 | 5.10,6.93,9.79 |
|  | 1,2,3 | 1,2,3 | **1,1,1** | 0.33,0.5,1 | 0.33,0.50,1 | 0.25,0.33,0.50 | 0.25,0.33,0.50 | 0.20,0.25,0.33 | 0.20,0.25,0.33 | 0.17,0.20,0.25 | 0.17,0.20,0.25 | 0.17,0.20,0.25 | 0.14,0.17,0.20 | 0.14,0.17,0.20 | 0.14,0.17,0.20 | 0.13,0.14,0.17 | 0.13,0.14,0.17 | 0.13,0.14,0.17 | 0.11,0.13,0.14 | 5.99,7.82,12.66 |
|  | 2,3,4 | 1,2,3 | 1,2,3 | **1,1,1** | 0.33,0.5,1 | 0.33,0.5,1 | 0.25,0.33,0.50 | 0.25,0.33,0.50 | 0.20,0.25,0.33 | 0.20,0.25,0.33 | 0.17,0.20,0.25 | 0.17,0.20,0.25 | 0.17,0.20,0.25 | 0.14,0.17,0.20 | 0.14,0.17,0.20 | 0.14,0.17,0.20 | 0.13,0.14,0.17 | 0.13,0.14,0.17 | 0.13,0.14,0.17 | 7.88,10.69,16.52 |
|  | 2,3,4 | 2,3,4 | 1,2,3 | 1,2,3 | **1,1,1** | 0.33,0.5,1 | 0.33,0.5,1 | 0.25,0.33,0.50 | 0.25,0.33,0.50 | 0.20,0.25,0.33 | 0.20,0.25,0.33 | 0.17,0.20,0.25 | 0.17,0.20,0.25 | 0.17,0.20,0.25 | 0.14,0.17,0.20 | 0.14,0.17,0.20 | 0.14,0.17,0.20 | 0.13,0.14,0.17 | 0.13,0.14,0.17 | 9.75,13.28,20.35 |
| **K** | 3,4,5 | 2,3,4 | 2,3,4 | 1,2,3 | 1,2,3 | **1,1,1** | 0.33,0.5,1 | 0.33,0.5,1 | 0.25,0.33,0.50 | 0.25,0.33,0.50 | 0.20,0.25,0.33 | 0.20,0.25,0.33 | 0.17,0.20,0.25 | 0.17,0.20,0.25 | 0.17,0.20,0.25 | 0.14,0.17,0.20 | 0.14,0.17,0.20 | 0.14,0.17,0.20 | 0.13,0.14,0.17 | 12.62,17.41,25.18 |
|  | 3,4,5 | 3,4,5 | 2,3,4 | 2,3,4 | 1,2,3 | 1,2,3 | **1,1,1** | 0.33,0.5,1 | 0.33,0.5,1 | 0.25,0.33,0.50 | 0.25,0.33,0.50 | 0.20,0.25,0.33 | 0.20,0.25,0.33 | 0.17,0.20,0.25 | 0.17,0.20,0.25 | 0.17,0.20,0.25 | 0.14,0.17,0.20 | 0.14,0.17,0.20 | 0.14,0.17,0.20 | 15.49,21.27,30.01 |
|  | 4,5,6 | 3,4,5 | 3,4,5 | 2,3,4 | 2,3,4 | 1,2,3 | 1,2,3 | **1,1,1** | 0.33,0.5,1 | 0.33,0.5,1 | 0.25,0.33,0.50 | 0.25,0.33,0.50 | 0.20,0.25,0.33 | 0.20,0.25,0.33 | 0.17,0.20,0.25 | 0.17,0.20,0.25 | 0.17,0.20,0.25 | 0.14,0.17,0.20 | 0.14,0.17,0.20 | 19.35,26.10,35.81 |
|  | 4,5,6 | 4,5,6 | 3,4,5 | 3,4,5 | 2,3,4 | 2,3,4 | 1,2,3 | 1,2,3 | **1,1,1** | 0.33,0.5,1 | 0.33,0.5,1 | 0.25,0.33,0.50 | 0.25,0.33,0.50 | 0.20,0.25,0.33 | 0.20,0.25,0.33 | 0.17,0.20,0.25 | 0.17,0.20,0.25 | 0.17,0.20,0.25 | 0.14,0.17,0.20 | 23.21,30.93,41.61 |
|  | 4,5,6 | 4,5,6 | 4,5,6 | 3,4,5 | 3,4,5 | 2,3,4 | 2,3,4 | 1,2,3 | 1,2,3 | **1,1,1** | 0.33,0.5,1 | 0.33,0.5,1 | 0.25,0.33,0.50 | 0.25,0.33,0.50 | 0.20,0.25,0.33 | 0.20,0.25,0.33 | 0.17,0.20,0.25 | 0.17,0.20,0.25 | 0.17,0.20,0.25 | 27.07,35.76,47.41 |
|  | 5,6,7 | 4,5,6 | 4,5,6 | 4,5,6 | 3,4,5 | 3,4,5 | 2,3,4 | 2,3,4 | 1,2,3 | 1,2,3 | **1,1,1** | 0.33,0.5,1 | 0.33,0.5,1 | 0.25,0.33,0.50 | 0.25,0.33,0.50 | 0.20,0.25,0.33 | 0.20,0.25,0.33 | 0.17,0.20,0.25 | 0.17,0.20,0.25 | 31.90,41.56,54.16 |
|  | 5,6,7 | 5,6,7 | 4,5,6 | 4,5,6 | 4,5,6 | 3,4,5 | 3,4,5 | 2,3,4 | 2,3,4 | 1,2,3 | 1,2,3 | **1,1,1** | 0.33,0.5,1 | 0.33,0.5,1 | 0.25,0.33,0.50 | 0.25,0.33,0.50 | 0.20,0.25,0.33 | 0.20,0.25,0.33 | 0.17,0.20,0.25 | 36.73,47.36,60.91 |
|  | 5,6,7 | 5,6,7 | 5,6,7 | 4,5,6 | 4,5,6 | 4,5,6 | 3,4,5 | 3,4,5 | 2,3,4 | 2,3,4 | 1,2,3 | 1,2,3 | **1,1,1** | 0.33,0.5,1 | 0.33,0.5,1 | 0.25,0.33,0.50 | 0.25,0.33,0.50 | 0.20,0.25,0.33 | 0.20,0.25,0.33 | 41.76,53.16,67.66 |
|  | 6,7,8 | 5,6,7 | 5,6,7 | 5,6,7 | 4,5,6 | 4,5,6 | 4,5,6 | 3,4,5 | 3,4,5 | 2,3,4 | 2,3,4 | 1,2,3 | 1,2,3 | **1,1,1** | 0.33,0.5,1 | 0.33,0.5,1 | 0.25,0.33,0.50 | 0.25,0.33,0.50 | 0.20,0.25,0.33 | 47.36,59.91,75.33 |
|  | 6,7,8 | 6,7,8 | 5,6,7 | 5,6,7 | 5,6,7 | 4,5,6 | 4,5,6 | 4,5,6 | 3,4,5 | 3,4,5 | 2,3,4 | 2,3,4 | 1,2,3 | 1,2,3 | **1,1,1** | 0.33,0.5,1 | 0.33,0.5,1 | 0.25,0.33,0.50 | 0.25,0.33,0.50 | 53.16,66.66,83.00 |
| ***HI*** | 6,7,8 | 6,7,8 | 6,7,8 | 5,6,7 | 5,6,7 | 5,6,7 | 4,5,6 | 4,5,6 | 4,5,6 | 3,4,5 | 3,4,5 | 2,3,4 | 2,3,4 | 1,2,3 | 1,2,3 | **1,1,1** | 0.33,0.5,1 | 0.33,0.5,1 | 0.25,0.33,0.5 | 58.91,73.33,90.50 |
|  | 7,8,9 | 6,7,8 | 6,7,8 | 6,7,8 | 5,6,7 | 5,6,7 | 5,6,7 | 4,5,6 | 4,5,6 | 4,5,6 | 3,4,5 | 3,4,5 | 2,3,4 | 2,3,4 | 1,2,3 | 1,2,3 | **1,1,1** | 0.33,0.5,1 | 0.33,0.5,1 | 65.66,81.00,99 |
|  | 8,9,9 | 7,8,9 | 6,7,8 | 6,7,8 | 6,7,8 | 5,6,7 | 5,6,7 | 5,6,7 | 4,5,6 | 4,5,6 | 4,5,6 | 3,4,5 | 3,4,5 | 2,3,4 | 2,3,4 | 1,2,3 | 1,2,3 | **1,1,1** | 0.33,0.5,1 | 73.33,89.50,107.00 |
| ***h*** | 8,9,9 | 8,9,9 | 7,8,9 | 6,7,8 | 6,7,8 | 6,7,8 | 5,6,7 | 5,6,7 | 5,6,7 | 4,5,6 | 4,5,6 | 4,5,6 | 3,4,5 | 3,4,5 | 2,3,4 | 2,3,4 | 1,2,3 | 1,2,3 | **1,1,1** | 81, 99, 115 |
| **Column Sum** | | | | | | | | | | | | | | | | | | | | 620.48,786.71,998.10 |
|  | | | | | | | | | | | | | | | | | | | | 1/998.10,1/786.71,1/620.48 |

**Table 5**: Fuzzy Synthetic Extent

| **Parameters** | **Fuzzy Synthetic Extent** | **Fuzzy Synthetic Extent Value** |
| --- | --- | --- |
| ***SI*** | (4.21,5.04,6.92)*(0.00100,0.00127,0.00161) | 0.004,0.006,0.011 |
|  | (5.10,6.93,9.79)*(0.00100,0.00127,0.00161) | 0.005,0.009,0.016 |
|  | (5.99,7.82,12.66)*(0.00100,0.00127,0.00161) | 0.006,0.010,0.020 |
|  | (7.88,10.69,16.52)*(0.00100,0.00127,0.00161) | 0.008,0.014,0.027 |
|  | (9.75,13.28,20.35)*(0.00100,0.00127,0.00161) | 0.010,0.017,0.033 |
| ***K*** | (12.62,17.41,25.18)*(0.00100,0.00127,0.00161) | 0.013,0.022,0.041 |
|  | (15.49,21.27,30.01)*(0.00100,0.00127,0.00161) | 0.015,0.027,0.048 |
|  | (19.35,26.10,35.81)*(0.00100,0.00127,0.00161) | 0.019,0.033,0.058 |
|  | (23.21,30.93,41.61)*(0.00100,0.00127,0.00161) | 0.023,0.039,0.067 |
|  | (27.07,35.76,47.41)*(0.00100,0.00127,0.00161) | 0.027,0.045,0.076 |
|  | (31.90,41.56,54.16)*(0.00100,0.00127,0.00161) | 0.032,0.053,0.087 |
|  | (36.73,47.36,60.91)*(0.00100,0.00127,0.00161) | 0.037,0.060,0.098 |
|  | (41.76,53.16,67.66)*(0.00100,0.00127,0.00161) | 0.042,0.068,0.109 |
|  | (47.36,59.91,75.33)*(0.00100,0.00127,0.00161) | 0.047,0.076,0.121 |
|  | (53.16,66.66,83.00)*(0.00100,0.00127,0.00161) | 0.053,0.085,0.134 |
| ***HI*** | (58.91,73.33,90.50)*(0.00100,0.00127,0.00161) | 0.059,0.093,0.146 |
|  | (65.66,81.00,99)*(0.00100,0.00127,0.00161) | 0.066,0.103,0.159 |
|  | (73.33,89.50,107)*(0.00100,0.00127,0.00161) | 0.073,0.114,0.172 |
| ***h*** | (81, 99, 115)*(0.00100,0.00127,0.00161) | 0.081,0.126,0.185 |

**Table 6**: Fuzzy Priorities for Criteria

|  | **l** | **m** | **u** | **Fuzzy Priority for criteria** | | | | | | | | | | | | | | | | | | **min.weig** | **nor.weig** |
| --- | --- | --- | --- | --- | --- | --- | --- | --- | --- | --- | --- | --- | --- | --- | --- | --- | --- | --- | --- | --- | --- | --- | --- |
| ***SI*** | 0.004 | 0.006 | 0.011 | 0.667 | 0.556 | 0.273 | 0.083 | 0.00000 | 0.000 | 0.000 | 0.000 | 0.000 | 0.000 | 0.000 | 0.000 | 0.000 | 0.000 | 0.000 | 0.000 | 0.000 | 0.000 | 0.083 | 0.01 |
|  | 0.005 | 0.009 | 0.016 | 1.000 | 0.909 | 0.615 | 0.429 | 0.188 | 0.053 | 0.000 | 0.000 | 0.000 | 0.000 | 0.000 | 0.000 | 0.000 | 0.000 | 0.000 | 0.000 | 0.000 | 0.000 | 0.053 | 0.01 |
|  | 0.006 | 0.01 | 0.02 | 1.000 | 1.000 | 0.750 | 0.588 | 0.368 | 0.227 | 0.042 | 0.000 | 0.000 | 0.000 | 0.000 | 0.000 | 0.000 | 0.000 | 0.000 | 0.000 | 0.000 | 0.000 | 0.042 | 0.01 |
|  | 0.008 | 0.014 | 0.027 | 1.000 | 1.000 | 1.000 | 0.850 | 0.636 | 0.480 | 0.296 | 0.138 | 0.000 | 0.000 | 0.000 | 0.000 | 0.000 | 0.000 | 0.000 | 0.000 | 0.000 | 0.000 | 0.138 | 0.02 |
|  | 0.01 | 0.017 | 0.033 | 1.000 | 1.000 | 1.000 | 1.000 | 0.800 | 0.643 | 0.467 | 0.313 | 0.176 | 0.027 | 0.000 | 0.000 | 0.000 | 0.000 | 0.000 | 0.000 | 0.000 | 0.000 | 0.027 | 0.00 |
| ***K*** | 0.013 | 0.022 | 0.041 | 1.000 | 1.000 | 1.000 | 1.000 | 1.000 | 0.839 | 0.667 | 0.514 | 0.378 | 0.225 | 0.095 | 0.000 | 0.000 | 0.000 | 0.000 | 0.000 | 0.000 | 0.000 | 0.095 | 0.02 |
|  | 0.015 | 0.027 | 0.048 | 1.000 | 1.000 | 1.000 | 1.000 | 1.000 | 1.000 | 0.829 | 0.676 | 0.538 | 0.381 | 0.250 | 0.128 | 0.020 | 0.000 | 0.000 | 0.000 | 0.000 | 0.000 | 0.02 | 0.004 |
|  | 0.019 | 0.033 | 0.058 | 1.000 | 1.000 | 1.000 | 1.000 | 1.000 | 1.000 | 1.000 | 0.854 | 0.721 | 0.565 | 0.438 | 0.314 | 0.204 | 0.088 | 0.000 | 0.000 | 0.000 | 0.000 | 0.088 | 0.02 |
|  | 0.023 | 0.039 | 0.067 | 1.000 | 1.000 | 1.000 | 1.000 | 1.000 | 1.000 | 1.000 | 1.000 | 0.870 | 0.714 | 0.588 | 0.463 | 0.351 | 0.233 | 0.129 | 0.015 | 0.000 | 0.000 | 0.015 | 0.00 |
|  | 0.027 | 0.045 | 0.076 | 1.000 | 1.000 | 1.000 | 1.000 | 1.000 | 1.000 | 1.000 | 1.000 | 1.000 | 0.846 | 0.722 | 0.596 | 0.483 | 0.365 | 0.262 | 0.147 | 0.042 | 0.000 | 0.042 | 0.01 |
|  | 0.032 | 0.053 | 0.087 | 1.000 | 1.000 | 1.000 | 1.000 | 1.000 | 1.000 | 1.000 | 1.000 | 1.000 | 1.000 | 0.877 | 0.750 | 0.635 | 0.515 | 0.412 | 0.296 | 0.187 | 0.076 | 0.076 | 0.01 |
|  | 0.037 | 0.06 | 0.098 | 1.000 | 1.000 | 1.000 | 1.000 | 1.000 | 1.000 | 1.000 | 1.000 | 1.000 | 1.000 | 1.000 | 0.875 | 0.761 | 0.643 | 0.542 | 0.427 | 0.316 | 0.205 | 0.205 | 0.04 |
|  | 0.042 | 0.068 | 0.109 | 1.000 | 1.000 | 1.000 | 1.000 | 1.000 | 1.000 | 1.000 | 1.000 | 1.000 | 1.000 | 1.000 | 1.000 | 0.886 | 0.767 | 0.667 | 0.551 | 0.439 | 0.326 | 0.326 | 0.06 |
|  | 0.047 | 0.076 | 0.121 | 1.000 | 1.000 | 1.000 | 1.000 | 1.000 | 1.000 | 1.000 | 1.000 | 1.000 | 1.000 | 1.000 | 1.000 | 1.000 | 0.883 | 0.785 | 0.671 | 0.558 | 0.444 | 0.444 | 0.08 |
|  | 0.053 | 0.085 | 0.134 | 1.000 | 1.000 | 1.000 | 1.000 | 1.000 | 1.000 | 1.000 | 1.000 | 1.000 | 1.000 | 1.000 | 1.000 | 1.000 | 1.000 | 0.904 | 0.791 | 0.678 | 0.564 | 0.564 | 0.10 |
| ***HI*** | 0.059 | 0.093 | 0.146 | 1.000 | 1.000 | 1.000 | 1.000 | 1.000 | 1.000 | 1.000 | 1.000 | 1.000 | 1.000 | 1.000 | 1.000 | 1.000 | 1.000 | 1.000 | 0.889 | 0.777 | 0.663 | 0.663 | 0.12 |
|  | 0.066 | 0.103 | 0.159 | 1.000 | 1.000 | 1.000 | 1.000 | 1.000 | 1.000 | 1.000 | 1.000 | 1.000 | 1.000 | 1.000 | 1.000 | 1.000 | 1.000 | 1.000 | 1.000 | 0.887 | 0.772 | 0.772 | 0.14 |
|  | 0.073 | 0.114 | 0.172 | 1.000 | 1.000 | 1.000 | 1.000 | 1.000 | 1.000 | 1.000 | 1.000 | 1.000 | 1.000 | 1.000 | 1.000 | 1.000 | 1.000 | 1.000 | 1.000 | 1.000 | 0.883 | 0.883 | 0.16 |
| ***h*** | 0.081 | 0.126 | 0.185 | 1.000 | 1.000 | 1.000 | 1.000 | 1.000 | 1.000 | 1.000 | 1.000 | 1.000 | 1.000 | 1.000 | 1.000 | 1.000 | 1.000 | 1.000 | 1.000 | 1.000 | 1.000 | 1.000 | 0.18 |
| **Sum** | | | | | | | | | | | | | | | | | | | | | | 5.54 | 1.00 |

**Table 7:** Final FAHP weightage

| **Final weight Value** | **Area (%)** | **Description** |
| --- | --- | --- |
| 3.8-4.7 | 1.80 | Very low |
| 4.7-5.1 | 5.82 | Low |
| 5.1-5.5 | 17.30 | Medium |
| 5.5-5.9 | 40.82 | High |
| 5.9-7.3 | 34.25 | Very high |
